# Supplementary material for: Physical pedotransfer functions to compute saturated hydraulic conductivity from bimodal characteristic curves for a range of New Zealand soils
Source: Copernicus journal article supplement (doi:10.5194/hess-2016-636), 2016-12-21
Supplement: Supplementary file [file hess-2016-636-AC7-supplement.pdf]

1

## 2 **Saturated hydraulic conductivity model computed from bimodal** 3 **water retention curves for a range of New Zealand soils**

4 Joseph Alexander Paul Pollacco<sup>1</sup>, Trevor Webb<sup>1</sup>, Stephen McNeill<sup>1</sup>, Wei Hu<sup>2</sup>, Sam Carrick<sup>1</sup>, Allan  
5 Hewitt<sup>1</sup>, Linda Lilburne<sup>1</sup>

6 <sup>1</sup> Landcare Research, PO Box 69040, Lincoln 7640, New Zealand

7 <sup>2</sup> New Zealand Institute for Plant & Food Research Limited, Private Bag 4704, Christchurch 8140, New Zealand

8 *Correspondence to:* Joseph A.P. Pollacco ([Pollacco.water@gmail.com](mailto:Pollacco.water@gmail.com))

9

10 **Abstract.** Descriptions of soil hydraulic properties, such as *soil moisture retention curve*,  $\theta(h)$ , and *saturated hydraulic*  
11 *conductivities*,  $K_s$ , are a prerequisite for hydrological models. Since the measurement of  $K_s$  is expensive, it is frequently derived  
12 from pedotransfer functions. Because it is usually more difficult to describe  $K_s$  than  $\theta(h)$  from pedotransfer functions, Pollacco  
13 et al. (2013) developed a physical unimodal model to compute  $K_s$  solely from hydraulic parameters derived from the Kosugi  
14  $\theta(h)$ . This unimodal  $K_s$  model, which is based on a unimodal Kosugi soil pore-size distribution, was developed by combining  
15 the approach of Hagen-Poiseuille with Darcy's law and by introducing three tortuosity parameters. We report here on (1) the  
16 suitability of the Pollacco unimodal  $K_s$  model to predict  $K_s$  for a range of New Zealand soils, and (2) further adaptations to this  
17 model to adapt it to dual-porosity structured soils for soils having aggregates by computing the soil water flux through a  
18 continuous function of an improved bimodal pore-size distribution. The improved bimodal  $K_s$  model was tested with a New  
19 Zealand data set derived from historical measurements of  $K_s$  and  $\theta(h)$  for a range of soils derived from sandstone and siltstone.  
20 The  $K_s$  data were collected using a small core size of 10 cm diameter, causing large uncertainty in replicate measurements.  
21 Predictions of  $K_s$  were further improved by distinguishing topsoils from subsoil. Nevertheless, as expected stratifying the data  
22 with soil texture only slightly improved the predictions of the physical  $K_s$  models because the  $K_s$  model is based on pore-size  
23 distribution and the calibrated parameters were obtained within the physically feasible range. The improvements made to the  
24 unimodal  $K_s$  model by using the new bimodal  $K_s$  model are modest when compared to the unimodal model, which is explained  
25 by the poor accuracy of measured total porosity. Nevertheless, the new bimodal model provides an acceptable fit to the  
26 observed data. The study highlights the importance of improving  $K_s$  measurements with larger cores.

27

28

29 **Keywords.** Saturated hydraulic conductivity; Bimodal; Kosugi model; Soil moisture retention curves; Pedotransfer functions;  
30 Tortuosity; Hagen-Poiseuille; soils; New Zealand; S-map

31

32 **Abbreviations.** **PTFs:** statistical pedotransfer functions; **S-map:** New Zealand soil database;  $\theta(h)$  soil moisture retention  
33 curve;  $K_s$  saturated hydraulic conductivity

34

## 35 1 Introduction

36 Modelling of the water budget, irrigation, and nutrient and contaminant transport through the unsaturated zone requires  
37 accurate soil moisture retention,  $\theta(h)$ , and unsaturated hydraulic conductivity,  $K(\theta)$ , curves. The considerable time and cost  
38 involved in measuring  $\theta(h)$  and  $K(\theta)$  directly for a range of soils mean that the information for specific soils of interest is often  
39 not available (Webb, 2003). Therefore, these curves are generally retrieved from pedotransfer functions (PTFs), which are  
40 statistical relationships that generate lower-precision estimates of physical properties of interest based on many rapid and  
41 inexpensive measurements (e.g. Balland and Pollacco, 2008; Pollacco, 2008; Anderson and Bouma, 1973; Webb, 2003,  
42 Cichota et al., 2013).

43  
44 The S-map database (Lilburne et al., 2012; Landcare Research, 2015) provides soil maps for the most intensively used  
45 land in New Zealand and is being gradually extended to give national coverage. S-map provides data for extensively used soil  
46 models, such as the soil nutrient model OVERSEER and the daily simulation model APSIM used by agricultural scientists.  
47 McNeill et al. (2012) used the New Zealand National Soils Database to derive PTFs to estimate  $\theta(h)$  at five tensions from  
48 morphological data of soils mapped in S-map. One of the current weaknesses of S-map is a lack of capacity to estimate  $K(\theta)$ .  
49 Building on the work of Griffiths et al. (1999), Webb (2003) showed that morphologic descriptors for New Zealand soils can  
50 be used to predict  $K_s$ . However, the predictions of  $K_s$  were found to be too coarse for application to the wide range of soils  
51 within S-map. Therefore, Cichota et al. (2013) tested published statistical PTFs developed in Europe and the USA to predict  
52  $\theta(h)$  and  $K(\theta)$  for a range of New Zealand soils. They combined the best two or three PTFs to construct ensemble PTFs. They  
53 considered the ensemble PTF for  $\theta(h)$  to be a reasonable fit, but the ensemble PTF for estimating  $K_s$  exhibited large scatter and  
54 was not as reliable. The poor performance when estimating  $K_s$  was possibly due to the absence of any measurements of pore-  
55 size distribution in their physical predictors (Watt and Griffiths, 1988; McKenzie and Jacquier, 1997; Chapuis, 2004;  
56 Mbonimpa et al., 2002), and also to the large uncertainties in the measurements from small cores (McKenzie and Cresswell,  
57 2002 ; Anderson and Bouma, 1973). Consequently, there is an urgent need in New Zealand to develop a physically based  $K_s$   
58 model which is based on pore-size distribution.

59  
60 Since PTFs developed to characterize  $\theta(h)$  are more reliable than PTFs to characterize  $K(\theta)$  (e.g., Balland and Pollacco,  
61 2008; Cichota et al., 2013), Pollacco et al. (2013) developed a new physical model that predicts unimodal  $K_s$  solely from  
62 hydraulic parameters derived from the Kosugi (1996)  $\theta(h)$ . The  $K_s$  model is derived by combining the Hagen-Poiseuille and  
63 Darcy law (Anon, 1993) and by incorporating three semi-empirical tortuosity parameters. The model is based on the soil pore-  
64 size distribution and has been successfully validated using the European HYPRES (Wösten et al., 1998; Wösten et al., 1999;  
65 Lilly et al., 2008) and the UNSODA databases (Leij et al., 1999; Schaap and van Genuchten, 2006), but has not yet been  
66 applied to New Zealand soils. Most New Zealand soils are considered to be structured, with two-stage drainage (Carrick et al.,  
67 2010; McLeod et al., 2008) and bimodal pore-size distribution (e.g. Durner, 1994). Romano and Nasta (2016) showed by using  
68 the HYDRUS-1D package that large errors arise in the computation of the water fluxes if unimodal  $\theta(h)$  and  $K(\theta)$  are used in  
69 structured soils. We therefore propose to improve the unimodal Pollacco et al. (2013)  $K_s$  model so that it can predict  $K_s$  for  
70 structured soils with bimodal porosity.

71  
72 Measured  $K_s$  values are widely recognised as one of the most variable soil attributes (McKenzie and Cresswell 2002;  
73 Carrick, 2009). This is also recognised for New Zealand soils, both due to the high variability over short distances in soil parent  
74 material, age, depth and texture, as well as strong macropore development with preferential macropore flow recognised as the  
75 norm rather than the exception in New Zealand soils (Webb et al., 2000; Carrick, 2009; McLeod et al., 2008). The measurement

76 variability is also expected to increase as the sampling diameter decreases because small cores provide an unrealistic  
 77 representation of the abundance and connectivity of macropores (McKenzie and Cresswell, 2002; Anderson and Bouma, 1973).  
 78 McKenzie and Cresswell (2002) suggest that the standard Australian laboratory measurements should use cores with minimum  
 79 diameter of 25 cm and 20 cm length. In New Zealand,  $K_s$  has been obtained by using small cores, commonly with 10 cm  
 80 diameter and 7.5 cm length. This has contributed to very high variability in measured  $K_s$  (Webb et al., 2000).

81 The objectives of this research were to:

- 82 • test the suitability of the unimodal Pollacco et al. (2013)  $K_s$  model to predict  $K_s$  from New Zealand soils,
- 83 • develop a  $K_s$  bimodal model that makes predictions in structured soils solely from hydraulic parameters derived from  
 84 the Kosugi  $\theta(h)$ ,
- 85 • derive the uncertainties of the predictions of the  $K_s$  bimodal model,
- 86 • provide recommendations on the critical data sets that are required to improve the S-map database in New Zealand.

## 87 2 Background

### 88 2.1 Kosugi unimodal water retention and unsaturated hydraulic conductivity curve

89 There are a number of closed-form unimodal expressions in the literature that compute the soil moisture retention curve  $\theta(h)$   
 90 and the unsaturated hydraulic conductivity  $K(\theta)$  curves, such as the commonly used van Genuchten (1980) and Brooks and  
 91 Corey (1964) curves. We selected the physically based Kosugi (1996) closed-form unimodal log-normal function expression  
 92 of  $\theta(h)$  and  $K(\theta)$  because its parameters are theoretically sound and relate to the soil pore-size distribution (Hayashi et al.,  
 93 2009). Soils have a large variation in pore radius,  $r$ , which follows a log-normal probability density function. The unimodal  
 94 Kosugi log-normal probability density function of pore radius ( $r$ ) is often written in the following form:

$$95 \quad \frac{d\theta}{dr} = \frac{\theta_s - \theta_r}{r \sigma \sqrt{2\pi}} \exp\left\{-\frac{[\ln(r/r_m)]^2}{2\sigma^2}\right\} \quad (1)$$

96 where  $\theta_r$  and  $\theta_s$  [ $\text{cm}^3 \text{cm}^{-3}$ ] are the *residual* and *saturated water contents*,  $r_m$  [cm] is the *median pore radius* and  $\sigma$  [-] denotes  
 97 the *standard deviation* of  $\ln(r)$ .

98

99 Let  $S_e$  denote the effective saturation, defining  $S_e(r) = (\theta - \theta_r)/(\theta_r - \theta_s)$ , such that  $0 \leq S_e \leq 1$ . Integrating Eq. (1)  
 100 from 0 to  $r$  yields the unimodal *water retention curve* as a function of  $r$ :

$$101 \quad S_e(r) = \frac{1}{2} \operatorname{erfc}\left[\frac{\ln r_m - \ln r}{\sigma \sqrt{2}}\right] \quad (2a)$$

$$102 \quad \text{with } r = \frac{r_m}{\exp\left[\operatorname{erfc}^{-1}\left[2 S_e\right] \sigma \sqrt{2}\right]} \quad (2b)$$

103 where  $\operatorname{erfc}$  is the complementary error function.

104

105

106 The Young–Laplace capillary equation relates the soil-pore radius,  $r$ , to the equivalent *matrix suction head*,  $h$  (cm), at  
 107 which the pore is filled or drained (i.e.,  $r = Y/h$ , where  $Y = 0.149 \text{ cm}^2$ ). Kosugi’s unimodal *moisture retention curve*  $\theta_{\text{uni}}(h)$  can  
 108 be written in terms of  $S_e$ :

$$109 \quad S_e(h) = \frac{1}{2} \operatorname{erfc} \left[ \frac{\ln h - \ln h_m}{\sigma \sqrt{2}} \right] \quad (3)$$

110 where  $h_m$  [cm] is the *median metric head*.

112 The unimodal Kosugi unsaturated hydraulic conductivity function  $K(\theta)$  is written as:

$$113 \quad K(S_e) = K_s \sqrt{S_e} \left\{ \frac{1}{2} \operatorname{erfc} \left[ \operatorname{erfc}^{-1}(2S_e) + \frac{\sigma}{\sqrt{2}} \right] \right\}^2 \quad (4)$$

114 where  $K_s$  ( $\text{cm day}^{-1}$ ) is the *saturated hydraulic conductivity*.

116  $\theta_s$  is computed from the *total porosity*,  $\phi$ , which is deduced from *bulk density* ( $\rho_b$ ) and *soil particle density* ( $\rho_p$ ) as follows:

$$117 \quad \phi = \left[ 1 - \frac{\rho_b}{\rho_p} \right] \quad (5)$$

118 Due to air entrapment,  $\theta_s$  seldom reaches saturation of the total pore space  $\phi$  (Carrick et al., 2011). Therefore, to take into  
 119 account the fact that not all pores are connected, we perform the following correction of  $\phi$  with  $\alpha$  in the range [0.9, 1]:

$$120 \quad \theta_s = \alpha \phi \quad (6)$$

121 It is accepted that  $\alpha = 0.95$  (Rogowski, 1971; Pollacco et al., 2013; Haverkamp et al., 2005; Leij et al., 2005), but in this study  
 122 the optimal  $\alpha$  was found to be 0.98, since using a value of 0.95 resulted in several soil samples with  $\theta_s$  ( $\theta$  measured at 5 kPa)  
 123 greater than  $\theta_s$ , which is not physically plausible. This was due to the inaccuracy of measuring  $\phi$  (discussed in Sect. 4.1).

124 The feasible range of the Kosugi hydraulic parameters is summarized in Table 1. The  $h_m$  and  $\sigma$  feasible range is taken  
 125 from Pollacco et al. (2013), who combined data from the HYPRES (Wösten et al., 1998; Wösten et al., 1999; Lilly et al., 2008)  
 126 and UNSODA (Leij et al., 1999; Schaap and van Genuchten, 2006) databases.

128 **Table 1. please insert here**

## 130 2.2 Pollacco unimodal saturated hydraulic conductivity model

131 The *saturated hydraulic conductivity* model,  $K_{s\_uni}$  (Pollacco et al., 2013) computes  $K_s$  from the Kosugi parameters  $\theta_s$ ,  $\theta$ ,  $\sigma$   
 132 and  $h_m$  (or  $r_m$ ).  $K_{s\_uni}$  is based on the pore-size distribution (Eq. (1)) and the tortuosity of the pores.  $K_{s\_uni}$  was derived by  
 133 adopting the method of Childs and Collisgeorge (1950) and modelling the soil water flux through a continuous function of  
 134 Kosugi (1996) pore-size distribution. This was performed by combining the Hagen-Poiseuille equation (Anon, 1993) with  
 135 Darcy’s law and introducing the connectivity and tortuosity parameters  $\tau_1$ ,  $\tau_2$  of Fatt and Dykstra (1951) and  $\tau_3$  of Vervoort  
 136 and Cattle (2003).  $K_{s\_uni}$  is computed as:

$$K_{s\_umi} = C (1 - \tau_1) (\theta_s - \theta_r)^{\frac{1}{1-\tau_3}} \int_0^1 r^{2(1-\tau_2)} dS_e \quad (7)$$

$$\text{with } C = \frac{1}{8} \frac{\rho_w g}{\eta}$$

where for water at 20°C, density of water  $\rho_w = 0.998 \text{ g cm}^{-3}$ , acceleration due to gravity  $g = 980.66 \text{ cm s}^{-2}$ , dynamic viscosity of water  $\eta = 0.0102 \text{ g cm}^{-1} \text{ s}^{-1}$  and  $C$  is a constant equal to  $1.03663 \times 10^9 \text{ cm day}^{-1}$ .

Integrating with  $S_e$  instead of  $r$  avoids the complication of finding the minimum and maximum value of  $r$ . Isolating  $r$  of Eq. (2b) and replacing it in Eq. (7) gives:

$$K_{s\_umi}(S_e) = C (1 - \tau_1) (\theta_s - \theta_r)^{\frac{1}{1-\tau_3}} \int_0^1 \left\{ \frac{Y/h_m}{\exp \left[ \text{erfc}^{-1}(2 S_e) \sigma \sqrt{2} \right]} \right\}^{2(1-\tau_2)} dS_e \quad (8a)$$

$$\text{or } K_{s\_umi} = C (1 - \tau_1) (\theta_s - \theta_r)^{\frac{1}{1-\tau_3}} \int_0^1 \left\{ \frac{r_m}{\exp \left[ \text{erfc}^{-1}(2 S_e) \sigma \sqrt{2} \right]} \right\}^{2(1-\tau_2)} dS_e \quad (8b)$$

and  $r_m = Y/h_m$  (Young–Laplace capillary equation)

where  $\tau_1$ ,  $\tau_2$ ,  $\tau_3$  are tortuosity parameters [0–1].

If tortuosity were not included ( $\tau_1$ ,  $\tau_2$ ,  $\tau_3 = 0$ ), the pore-size distribution model would mimic the permeability of a bundle of straight capillary tubes. Vervoort and Cattle (2003) state: “*In reality soils are much more complex, with twisted and crooked pores, dead-ending or connecting to other pores. This means that there is a need to scale the permeability from the capillary tube model to include increased path length due to crookedness of the path (tortuosity) or lack of connection between points in the soil (connectivity)*”. Soils that are poorly connected and have highly crooked pathways theoretically have  $\tau_1$ ,  $\tau_2$ ,  $\tau_3 \approx 0.9$ . Further explanation of tortuosity is provided in Table 2.

**Table 2. Please insert here**

### 2.3. Romano bimodal water retention curve

New Zealand soils are predominantly well structured, with two-stage drainage (Carrick et al., 2010; McLeod et al., 2008), and therefore have a bimodal pore-size distribution (e.g. Durner, 1994). As  $K_{s\_uni}$  is based on a unimodal curve,  $\theta_{uni}(h)$ , the proposed bimodal model,  $K_{s\_bim}$ , should be based on a bimodal  $\theta_{bim}(h)$  curve.

Borgesen et al. (2006) showed that structured soils have both *matrix* (inter-aggregate) pore spaces and *macropore* (intra-aggregate) pore spaces. Thus, when the pores are initially saturated ( $r > R_{mac}$ ) or ( $h < H_{mac}$ ), the flow is considered *macropore* flow, and when the soil is desaturated ( $r < R_{mac}$ ) or ( $h > H_{mac}$ ), the flow is considered *matrix flow*, as shown in Fig. 1.  $R_{mac}$  is the theoretical pore size  $r$  that delimits macropore and matrix flow and  $H_{mac}$  is the theoretical pressure that delimits macropore and matrix flow. To model bimodal pore-size distribution Durner (1994) superposes two unimodal pore-size distributions by

167 using an empirical weighting factor,  $W$ , which partitions the volumetric percentage of macropore and matrix pores. Recently  
 168 Romano et al. (2011) proposed the following Kosugi bimodal  $\theta_{\text{bim\_rom}}(h)$  distribution:

$$169 \quad \theta_{\text{bim\_rom}}(h) = (\theta_s - \theta_r) \left\{ W \operatorname{erfc} \left[ \frac{\ln h - \ln h_{m\_mac}}{\sigma_{\_mac} \sqrt{2}} \right] + (1 - W) \operatorname{erfc} \left[ \frac{\ln h - \ln h_m}{\sigma \sqrt{2}} \right] \right\} + \theta_r \quad (9)$$

170 where  $\theta_s$ ,  $h_{m\_mac}$  and  $\sigma_{\_mac}$  are, respectively, the *saturated water content*, the *median pore radius* and the *standard deviation* of  
 171  $\ln(h)$  of the macropore domain,  $\theta_r$ ,  $h_m$  and  $\sigma$  are parameters of the matrix domain, and  $W$  is a constant in the range  $[0,1)$ .

### 172 3 Theoretical development of novel bimodal saturated hydraulic conductivity

173 We report on further adaptations to the physical model of Pollacco et al. (2013) to suit it to dual-porosity structured soils,  
 174 which are common in New Zealand, solely from Kosugi hydraulic parameters describing  $\theta(h)$ . This involves:

- 175 • rewriting the Romano bimodal  $\theta(h)$  (Sec. 3.1),
- 176 • developing a novel bimodal  $K_s$  model based on the modified bimodal  $\theta(h)$  (Sec. 3.2).

#### 177 3.1 Modified Romano bimodal water retention curve

178 We propose a modified version of  $\theta_{\text{bim\_rom}}(h)$  (Eq. (9)) that does not use the empirical parameter  $W$ . Our modified function,  
 179  $\theta_{\text{bim}}(h)$ , is plotted in Fig. 1 and is computed as:

$$181 \quad \theta_{\text{bim}}(h) = \theta_{\text{bim\_mat}}(h) + \theta_{\text{bim\_mac}}(h) \quad (10a)$$

$$182 \quad \theta_{\text{bim\_mat}}(h) = [\theta_{s\_mac} - \theta_r] \operatorname{erfc} \left[ \frac{\ln h - \ln h_m}{\sigma \sqrt{2}} \right] + \theta_r \quad (10b)$$

$$183 \quad \theta_{\text{bim\_mac}}(h) = [\theta_s - \theta_{s\_mac}] \operatorname{erfc} \left[ \frac{\ln h - \ln h_{m\_mac}}{\sigma_{\_mac} \sqrt{2}} \right] \quad (10c)$$

184 where  $\theta_{s\_mac}$  is the *saturated water content* that theoretically differentiates *macropore* and *matrix* domains.

185  
 186 The shape of  $\theta_{\text{bim}}(h)$  is identical to that of  $\theta_{\text{bim\_rom}}(h)$ , but the advantage of  $\theta_{\text{bim}}(h)$  is that it uses the physical parameter  
 187  $\theta_{s\_mac}$  instead of the empirical parameter  $W$ , and  $\theta_{s\_mac}$  ( $\leq \theta_s$ ) is more easily parameterized than  $W$  particularly when there is no  
 188 available data in the macropore domain. When we do not have data in the macropore domain,  $\theta_{s\_mac}$  is determined by fitting  
 189 the hydraulic parameters  $\theta_{s\_mac}$ ,  $\theta_r$ ,  $h_m$ ,  $\sigma$  of  $\theta_{\text{bim\_mat}}(h)$  (Eq. (10b)) solely in the matrix range ( $r < R_{\text{mac}}$  or  $h > H_{\text{mac}}$ ) Fig. 1 shows  
 190 that  $R_{\text{mac}}$  and  $\theta_{s\_mac}$  delimit the matrix and the macropore domains and that  $r_m$  of the Kosugi model is the inflection point of  
 191  $\theta_{\text{bim\_mat}}(h)$  and  $r_{m\_mac}$  is the inflection point of  $\theta_{\text{bim\_mac}}(h)$ .

192  
 193 **Fig. 1. Please put it here**  
 194  
 195

196 **3.2 Novel bimodal saturated hydraulic conductivity model**

197 Using  $\theta_{\text{bim}}(h)$ , we propose a new bimodal  $K_{s\_bim}$  that is derived following  $K_{s\_uni}$  (Eq. (7)) but for which we add a macropore  
198 domain:

199 
$$K_{s\_bim} = K_{s\_bim\_mat} + K_{s\_bim\_mac} \quad (11a)$$

200 
$$K_{s\_bim\_mat} = C \int_0^1 (1 - \tau_1) (\theta_{s\_mac} - \theta_r)^{\frac{1}{1-\tau_3}} (r_{matrix})^{2(1-\tau_2)} dS_e \quad (11b)$$

201 
$$K_{s\_bim\_mac} = C \int_0^1 (1 - \tau_{1\_mac}) (\theta_s - \theta_{s\_mac})^{\frac{1}{1-\tau_{3\_mac}}} (r_{macropore})^{2(1-\tau_{2\_mac})} dS_e \quad (11c)$$

202 where  $r_{macropore}$  is  $r \geq R_{mac}$  and  $r_{matrix}$  is  $r < R_{mac}$ .

203 The  $r_{matrix}$  of Eq. (11b) is derived from Eq. (2b):

204 
$$r_{matrix} = \frac{r_m}{\exp\left[erfc^{-1}\left[2 S_e\right] \sigma \sqrt{2}\right]} \quad (12)$$

205 and  $r_{macropore}$  is computed similarly as:

206 
$$r_{macropore} = \frac{r_{m\_mac}}{\exp\left[erfc^{-1}\left[2 S_e\right] \sigma_{mac} \sqrt{2}\right]} \quad (13)$$

207

208 We introduced  $r_{matrix}$  (Eq. (12)) and  $r_{macropore}$  (Eq. (13)) into  $K_{s\_bim}$  (Eq. (11a)), giving the equation for  $K_{s\_bim}$ :

209 
$$K_{s\_bim} = C \int_0^1 \left[ \begin{aligned} & (1 - \tau_1) (\theta_{s\_mac} - \theta_r)^{\frac{1}{1-\tau_3}} \left\{ \frac{r_m}{\exp\left[erfc^{-1}\left[2 S_e\right] \sigma \sqrt{2}\right]} \right\}^{2(1-\tau_2)} + \\ & (1 - \tau_{1\_mac}) (\theta_s - \theta_{s\_mac})^{\frac{1}{1-\tau_{3\_mac}}} \left\{ \frac{r_{m\_mac}}{\exp\left[erfc^{-1}\left[2 S_e\right] \sigma_{mac} \sqrt{2}\right]} \right\}^{2(1-\tau_{2\_mac})} \end{aligned} \right] dS_e \quad (14a)$$

210 or

211 
$$K_{s\_bim} = C \int_0^1 \left[ \begin{aligned} & (1 - \tau_1) (\theta_{s\_mac} - \theta_r)^{\frac{1}{1-\tau_3}} \left\{ \frac{\frac{Y}{h_m}}{\exp\left[erfc^{-1}\left(2 S_e\right) \sigma \sqrt{2}\right]} \right\}^{2(1-\tau_2)} + \\ & (1 - \tau_{1\_mac}) (\theta_s - \theta_{s\_mac})^{\frac{1}{1-\tau_{3\_mac}}} \left\{ \frac{\frac{Y}{h_{m\_mac}}}{\exp\left[erfc^{-1}\left(2 S_e\right) \sigma_{mac} \sqrt{2}\right]} \right\}^{2(1-\tau_{2\_mac})} \end{aligned} \right] dS_e \quad (14b)$$

212

213 In Eq. (14b),  $r_{m\_mac}$  is replaced by  $Y/h_{m\_mac}$  and  $r_m$  is replaced by  $Y/h_m$ . Note that the bimodal  $K_s$  model requires that the flow  
214 in the macropore domain obeys the Buckingham–Darcy law. Therefore, this model's performance may be restricted in cases  
215 of non-Darcy flow, such as non-laminar and turbulent flow, which may occur in large macropores.

216

217 In this study  $\sigma_{mac}$  is not derived from measured  $\theta(h)$  because measured data in the macropore domain are not always  
218 available, and so it will be treated as a fitting parameter. As discussed above,  $\theta_{s\_mac}$ ,  $\theta_r$ ,  $\sigma$  and  $h_m$  are optimized with  $\theta_{uni}(h)$   
219 measurement points only in the matrix range ( $r < R_{mac}$  or  $h > H_{mac}$ ), which means that  $\theta_s$  is not included in the observation data.  
220 In summary,  $K_{s\_bim}$  requires optimization of the parameters  $\tau_1$ ,  $\tau_2$ ,  $\tau_3$ , and  $\tau_{1\_mac}$ ,  $\tau_{2\_mac}$ ,  $\tau_{3\_mac}$  and  $h_{m\_mac}$ ,  $\sigma_{mac}$  (if no data are  
221 available in the macropore domain). The theoretically feasible range of the parameters of  $K_{s\_bim}$  is shown in Table 3.

222

223

**Table 3. Please put table here.**

224

225 One of the limitations of the New Zealand data set is that it has no  $\theta(h)$  data points in the macropore domain. The closest  
226 data point near saturation is  $\theta(h = 50 \text{ cm})$ , which is in the matrix pore space. Carrick et al. (2010) found that  $H_{mac}$  ranges from  
227 5 to 15 cm, with an average  $H_{mac} = 10 \text{ cm}$ , which corresponds to a circular pore radius of  $R_{mac} = 0.0149 \text{ cm}$  (e.g. Jarvis, 2007;  
228 Jarvis and Messing, 1995; Messing and Jarvis, 1993). Therefore, to reduce the number of optimized parameters we make the  
229 following assumption:

$$230 \quad h_{m\_mac} = \exp \left[ \frac{\ln(H_{mac})}{P_{m\_mac}} \right] \quad (15)$$

231 where  $P_{m\_mac}$  is a fitting parameter greater than 1. We found the fitted value of  $P_{m\_mac}$  was 2.0, however this fitted parameter  
232 was very broadly determined. The cause might be that we are optimizing  $\sigma_{mac}$  and therefore  $h_{m\_mac}$  and  $\sigma_{mac}$  might be *linked*.  
233 *Linked parameters* (Pollacco et al., 2008a, 2008b, 2009) means that there is an infinite combination of sets of linked parameters  
234  $h_{m\_mac}$  and  $\sigma_{mac}$  which produces values of objective function close to that obtained with the optimal parameter set and for  
235 which there exists a continuous relationship between  $h_{m\_mac}$  and  $\sigma_{mac}$ . Further research needs to determine if having more data  
236 in the macropore domain would reduce the cause of non-uniqueness. To illustrate  $h_{m\_mac}$ , the equivalent  $r_{m\_mac}$  point is shown  
237 in Fig. 1, where  $r_{m\_mac}$  is the inflection point of the macropore domain. Fig. 1 also shows that the matrix and the macropore  
238 domains meet at  $R_{mac} (H_{mac})$ .

## 239 4 Methods

### 240 4.1 Measurement of physical soil properties

241 The soil data used in this study were sourced from two data sets. In the first data set (Canterbury Regional Study; Table  
242 4) soils were derived from eight soils series on the post-glacial and glacial alluvial fan surfaces of the Canterbury Plains (Webb  
243 et al., 2000). The soils varied from shallow, well-drained silt loam soils to deep, poorly drained clay loam soils. The second  
244 data set was derived from the Soil Water Assessment and Measurement Programme to physically characterize key soils  
245 throughout New Zealand in the 1980s. Soils selected from this data set are listed by region in Table 4 and were selected from  
246 soils formed from sediments derived from indurated sandstone rocks, because this is the most common parent material for  
247 soils in New Zealand and has a reasonably representative number of soils analysed for physical properties.

248

249 The cores for particle size analysis and measurement of  $\theta(h)$  had diameters which ranges from 5.5 cm to 10 cm diameter  
250 and having height which varied from 5 to 6 cm. The 5, 10 kPa measurements of the  $\theta(h)$  were derived using the suction table  
251 method as per Dane and Topp, (2002) following the NZ Soil Bureau laboratory method (Gradwell, 1972). For the 20 to 1500



252 kPa of the  $\theta(h)$  were measured using pressure plate method as per Dane and Topp, (2002), following the NZ Soil Bureau  
253 method (Gradwell, 1972). The laboratory analysis for particle size followed Gradwell (1972).

254  
255 The total porosity,  $\phi$ , described in Eq. (5) contains uncertainties from the measurement methods, where  $\phi$  is derived from  
256 separate measurements of particle density and bulk density, rather than being directly measured. The uncertainty in  $\phi$   
257 measurements appeared to have reduced the demonstrated benefits of using  $K_{s\_bim}$  instead of  $K_{s\_uni}$ , which strongly relies on  
258  $\phi \alpha - \theta_{s\_mac}$  and may have caused the optimal  $\alpha$  to be 0.98 and not the commonly accepted value of 0.95 (Rogowski, 1971;  
259 Pollacco et al., 2013; Haverkamp et al., 2005; Leij et al., 2005).

260  
261 **Table 4. Please put here**

262  
263 The  $K_s$  data used were collected and processed at a time when the best field practices in New Zealand were still being  
264 explored.  $K_s$  was derived using constant-head Mariotte devices (1 cm head) from three to six cores (10 cm diameter and 7.5  
265 cm thickness) for each horizon. The  $\log_{10}$  scale value of the standard error of the replicates of the measurements is shown in  
266 Fig. 2, which shows large uncertainty in the measurements (up to three orders of magnitude). This uncertainty is due to:

- 267 a) **measurements of  $\theta(h)$  and  $K_s$  being taken on different cores**, which caused some mismatch between  $\theta(h)$  and  $K_s$ ,  
268 resulting in 16 outliers that negatively influenced the overall fit of the  $K_s$  model having to be removed from the data set,
- 269 b) **side leakage** of some cores, which led to  $K_s$  values that were too high (Carrick, 2009), resulting in six samples with  
270 unusually high  $K_s$  having to be removed from the data set,
- 271 c) **misreporting low  $K_s$**  since the measurements of  $K_s$  were halted when conductivity was less than  $0.1 \text{ cm day}^{-1}$ , resulting  
272 in four samples with low  $K_s$  having to be removed from the data set,
- 273 d) **small core samples**, which led to considerable variability in the absence/presence of structured cracks caused by roots  
274 or worm burrows (McKenzie and Cresswell, 2002; Anderson and Bouma, 1973) that were evident in dyed samples; we  
275 therefore removed measured  $K_s$  replicates that were too high and showed evidence of macropore abundance by having  
276 values of  $\theta_s - \theta_{s\_mac} > 0.05$ .

277 We therefore selected 235/262 samples (90%) and removed only 27 outliers, which is minimal compared, for instance, to the  
278 UNSODA (Leij et al., 1999; Schaap and van Genuchten, 2006) and HYPRES databases (Wösten et al., 1998; Wösten et al.,  
279 1999; Lilly et al., 2008), which are used for the development of PTFs such as the ROSETTA PTF (Patil and Rajput, 2009;  
280 Rubio, 2008; Young, 2009), and which were found to contain a large number of outliers. Using these databases, Pollacco et  
281 al. (2013) selected only 73/318 soils (23%), which complied with strict selection criteria prior to modelling.

282  
283 Note that the  $K_s$  observations in the topsoils have greater variability than in the subsoil layers (Fig. 2). This is because  
284 topsoils are more disturbed by anthropogenic disturbance and biological activity. Therefore, the topsoils also have a greater  
285 abundance of macropores, and therefore are more prone to error when the sampling is performed with a small core size that  
286 does not contain a representative volume of the macropore network.

287  
288 **Fig. 2. Please insert figure here**

## 290 4.2 Inverse modelling and goodness of fit

291 The parameterization of the model was performed in two consecutive steps:

- 292 1. Optimization of  $\theta_{s\_mac}$ ,  $\theta_r$ ,  $h_m$  and  $\sigma$  of the unimodal Kosugi  $\theta_{bim\_mat}(h)$  (Eq. (10b)) was performed by matching  
293 observed and simulated  $\theta(h)$  in the range  $h < H_{mac}$  (as discussed,  $\theta_s$  is not included in the observation data since we  
294 did not have data in the macropore domain). The feasible ranges of the Kosugi parameters are described in Table 1.
- 295 2. Optimization of the  $\tau_1$ ,  $\tau_2$ ,  $\tau_3$  of the  $K_{s\_uni}$  model (Eq. (8)) and  $\tau_{1\_mac}$ ,  $\tau_{2\_mac}$ ,  $\tau_{3\_mac}$ ,  $\sigma_{mac}$  parameters of the  $K_{s\_bim}$   
296 models (Eq. (14)), where the physical feasible ranges of the tortuosity parameters are described in Table 3.

297 The inverse modelling was performed in MATLAB using AMALGAM, which is a robust global optimization algorithm  
298 (<http://faculty.sites.uci.edu/jasper/sample/>) (e.g., ter Braak and Vrugt, 2008). For each step, we minimized the objective  
299 functions described below.

300

301 The objective function,  $OF_\theta$ , used to parameterize Kosugi's  $\theta(h)$  at the following pressure points [5, 10, 20, 40, 50, 100,  
302 1500 kPa], is described by:

$$303 \quad OF_\theta = \sum_{i=1}^{i=N_\theta} [\theta_{sim}(h_i, \mathbf{p}_\theta) - \theta_{obs}(h_i)]^{P_{over}} \quad (16)$$

304 where the subscripts *sim* and *obs* are simulated and observed, respectively.  $\mathbf{P}_\theta$  is the set of predicted parameters ( $\theta_{s\_mac}$ ,  $\theta_r$ ,  $h_m$ ,  
305  $\sigma$ ) and  $P_{over}$  is the power of the objective function. The computation of  $K_{s\_bim}$  requires  $\theta(h)$  to be accurate near saturation, when  
306 the drainage is mostly from large pores, and to achieve this balance we found by trial and error that best results are achieved  
307 when  $P_{over} = 6$ .

308

309 The parameters of  $K_{s\_uni}$  and  $K_{s\_bim}$  models were optimized by minimizing the following objective function  $OF_{ks}$ :

$$310 \quad OF_{ks} = \sum_{j=1}^{j=N_{ks}} [\ln K_{s\_sim}(\mathbf{p}_{ks}) - \ln K_{s\_obs}]^2 \quad (17)$$

311 where the subscripts *sim* and *obs* are simulated and observed, respectively.  $\mathbf{P}_{ks}$  is the vector of the unknown parameters. The  
312 log transformation of  $OF_{ks}$  puts more emphasis on the lower  $K_s$  and therefore reduces the bias towards larger conductivity (e.g.  
313 van Genuchten et al., 1991; Pollacco et al., 2011). Also, the log transformation considers that the uncertainty in measured  
314 unsaturated hydraulic conductivity increases as  $K(\theta)$  increases.

315

316 The goodness of fit between simulated ( $K_{s\_uni}$  or  $K_{s\_bim}$ ) and observed  $K_s$  was computed by the  $RMSE_{\log_{10}}$ :

$$317 \quad RMSE_{\log_{10}} = \sqrt{\frac{\sum_{j=1}^{j=N_{ks}} [\log_{10} K_{s\_sim} - \log_{10} K_{s\_obs}]^2}{N}} \quad (18)$$

318 where  $N$  is the number of data points.

319

320 The following transformation was necessary to scale the parameters to enable the global optimization to converge to a  
321 solution:

$$322 \quad \tau_1 = 1 - 10^{-T1} \quad (19)$$

323 where  $T_1$  is a transformed tortuosity  $\tau_1$ . Introducing Eq. (19) into  $K_{s\_bim}$  Eq. (14) gives:

$$324 \quad K_{s\_bim} = C \int_0^1 \left[ \begin{aligned} & 10^{-T_1} (\theta_{s\_mac} - \theta_r)^{\frac{1}{1-\tau_3}} \left\{ \frac{\frac{Y}{h_m}}{\exp \left[ \operatorname{erfc}^{-1}(2 S_e) \sigma \sqrt{2} \right]} \right\}^{2(1-\tau_2)} + \\ & 10^{-T_{1\_mac}} (\theta_s - \theta_{s\_mac})^{\frac{1}{1-\tau_{3\_mac}}} \left\{ \frac{\frac{Y}{h_{m\_mac}}}{\exp \left[ \operatorname{erfc}^{-1}(2 S_e) \sigma_{\_mac} \sqrt{2} \right]} \right\}^{2(1-\tau_{2\_mac})} \end{aligned} \right] dS_e \quad (20)$$

325

## 326 5 Results and discussion

327 We report on (1) the suitability of the  $K_{s\_uni}$  model (developed with European and American data sets, Pollacco et al., 2013) to  
 328 predict  $K_s$  for New Zealand soils experiencing large uncertainties, as shown in Fig. 2; (2) improvements made by stratifying  
 329 the data with texture and topsoil/subsoil; and (3) enhancements made by using the bimodal  $K_{s\_bim}$  instead of the unimodal  
 330  $K_{s\_uni}$ .

331

### 332 5.1 Improvement made by stratifying with texture and topsoil/subsoil

333 It was expected that stratifying with texture and topsoil/subsoil (layers) should improve the predictions of  $K_s$  to only a  
 334 modest degree. This is because  $K_{s\_bim}$  and  $K_{s\_uni}$  are physically based models that are based on pore-size distribution, and  
 335 therefore stratifying with soil texture or topsoil/subsoil are not likely to provide extra information. For instance, Arya and Paris  
 336 (1981) showed that there is a strong relationship between pore-size distribution and the particle-size distribution and therefore  
 337 adding soil texture information should not improve the model.

338

339 **Table 5. please put table here**

340

341 As expected, no significant improvements were made by stratifying with soil texture compared with a model that groups  
 342 all texture classes (loam and clay) and layers (topsoil and subsoil) (overall improvement of 3%) (Table 5). However, a  
 343 significant improvement was made by stratifying by layer (topsoil and subsoil) (overall improvement of 23%), and therefore  
 344 the remaining results are presented by stratifying by layer. These results are obtained because topsoils have higher macropores  
 345 and a smaller tortuous path than that in subsoil, as demonstrated by  $\tau_{1\_top} > \tau_{1\_sub}$  OR  $T_{1\_top} < T_{1\_sub}$ ,  $\tau_{2\_top} > \tau_{2\_sub}$ ,  $\tau_{3\_top} > \tau_{3\_sub}$   
 346 (Table 6). It is important to note that tortuosity decreases as  $\tau$  becomes closer to 1.

347

348 **Table 6. Please put table here**

349

## 350 5.2 Improvement made by using $K_{s\_bim}$ instead of $K_{s\_uni}$

351 Figure 3 shows an acceptable fit between  $K_{s\_bim}$  and  $K_{s\_obs}$  ( $RMSE_{log_{10}} = 0.450 \text{ cm day}^{-1}$ ), recognizing that the  
352 observations contain large uncertainties since the measurements were taken by using small cores (Sect. 4.1). The overall  
353 improvement made by using  $K_{s\_bim}$  is somewhat modest (5% for all soils). As expected, the reasonable improvement is greater  
354 for topsoil containing higher macroporosity (12% improvement) than for subsoil (4% improvement) (Table 6). This is because  
355 topsoil has higher macropore  $\theta_{mac}$  ( $\theta_s - \theta_{s\_mac}$ ) (Table 7) caused by earthworm channels, fissures, roots and tillage than subsoil.  
356 The  $RMSE_{log_{10}}$  of  $K_{s\_uni}$  for subsoil is  $0.47 \text{ cm day}^{-1}$  (Table 6) which is slightly worse compared to the  $RMSE_{log_{10}}$  of  $0.420$   
357  $\text{cm day}^{-1}$  by using UNSODA and HYPRES data sets (Pollacco et al., 2013).

358

359 **Table 7. Please put table here**

360

361 The reason  $K_{s\_bim}$  shows smaller-than-expected improvements compared to  $K_{s\_uni}$  requires further investigation and testing  
362 with a data set containing fewer uncertainties. One plausible explanation is that  $K_{s\_bim}$  is highly sensitive to  $\theta_s$ , computed from  
363 total porosity  $\phi$  (Eq. (6)), which had inherent measurement uncertainties (Sect. 4.1). In addition, the possible existence of non-  
364 Darcy flow in large biological pores may decrease the outperformance of the bimodal model over the unimodal model.

365

366 **Fig. 3. Please insert Figure 3 here**

367

## 368 5.3 Optimal tortuosity parameters

369 The optimal tortuosity parameters of  $K_{s\_bim}$  and  $K_{s\_uni}$  (Table 6) show that the optimal parameters are within the physically  
370 feasible limits, except for  $\tau_{3\_mac}$  of the subsoil, which are greater than  $\tau_3$ . This is understandable because Pollacco et al. (2013)  
371 found  $\tau_3$  not to be a very sensitive parameter. As expected,  $T_{1\_mac}$  is smaller than  $T_1$  ( $\tau_{1\_mac} > \tau_1$ ), which suggests that the  
372 tortuosity parameters have a physical meaning.

373

374 The estimated value of the unimodal  $T_1$  parameter  $K_{s\_uni}$  derived from the UNSODA and HYPRES data sets ( $T_1 = 0.1$ ) (Pollacco  
375 et al., 2013) is very different from the value estimated in this present study ( $T_1 = 6.5$ ). Cichota et al. (2013) also reported that  
376 PTFs developed in Europe and the USA were not applicable to New Zealand. The reasons why these PTFs are not directly  
377 applicable to New Zealand require further investigation.

378

## 379 5.4 Uncertainty of the bimodal saturated hydraulic conductivity model predictions

380 The practical application of the bimodal saturated hydraulic conductivity model,  $K_{s\_bim}$ , to New Zealand soils requires a  
381 model for the uncertainty of the resultant predictions, since it is then possible to attach a value for the uncertainty of future  
382 predictions of  $K_s$ . In a conventional parametric statistical model, the uncertainty model follows from the structure of the fitting  
383 model itself. In the present work,  $K_s$  is estimated using an inverse model and this has no associated functional uncertainty  
384 model. For this reason, the uncertainty is derived empirically by fitting a relationship between the transformed residuals of the  
385 model (the log-transformed measured  $K_s$  minus the log-transformed estimated  $K_s$ ) as a function of the log-transformed  
386 estimated  $K_s$ . Although the uncertainty model could be derived from all the soils in the study, this process results in a pooled  
387 estimate for uncertainty (e.g., aggregated root mean square error). However, it has been observed that topsoils and subsoils

388 have different uncertainty behaviour for the estimated  $K_s$ , so it is desirable to include an indicator variable to determine whether  
389 the soil is a topsoil or not. In explicit form,

$$390 \quad \log_{10} K_{s\_obs} - \log_{10} K_{s\_sim} = a_1 L + a_0 + \epsilon \quad (21)$$

391 where  $a_0$  and  $a_1$  are fitting constants,  $L$  is an indicator variable specifying whether the soil is a topsoil (value 1), or a  
392 subsoil (value 0), and  $\epsilon$  is the uncertainty distribution. The distribution of the uncertainty  $\epsilon$  could take a number of forms,  
393 but there is no obvious choice, except that one might expect the distribution central measure to be unbiased. To avoid an  
394 explicit distribution assumption, we fitted a conditional quantile model (Koenker, 2005) for the transformed residuals, based  
395 on the  $\tau$  quantile, where  $\tau = 0.5$  corresponds to the conditional median, and  $\tau = 0.025$  and  $\tau = 0.975$  correspond  
396 respectively to the 2.5% and 97.5% quantiles, and thus together describe the 95% containment interval of the residuals.

397 The conditional quantile model Eq. (21) was fitted using  $\tau = 0.5, 0.025$  and  $0.975$  (Table 8). The results suggest a  
398 strong dependence of the scale of the residuals on whether the soil is a topsoil or not, but the size of the 95% residual  
399 containment interval is not dependent on the simulated  $K_s$ . Notably, the confidence interval for the fitted median ( $\tau = 0.5$ )  
400 quantile model suggests that the uncertainty distribution median is unbiased; thus predictions from  $K_{s\_bim}$  show no propensity  
401 for bias, which is a desirable result.

402

403 **Table 8. Please put here**

404

405 Another way to illustrate the uncertainty model is to plot the observed  $\log_{10} K_{s\_obs}$  against the estimated  $\log K_{s\_bim}$ ,  
406 with the fitted median, lower and upper 95% quantile lines, as shown in Fig. 4. The width of the 95% containment interval for  
407 the residuals is narrower (i.e., the predictions appear to be more accurate) for topsoils. The quantile estimates for the conditional  
408 median of both topsoil and subsoil are also shown in Fig. 4, with the shaded region showing the 95% confidence interval of  
409 the median estimate. The shaded region covers the one-to-one line in Fig. 4, and thus there is no compelling evidence that the  
410 median residual distribution is biased.

411

412 **Fig. 4. Please put here**

413

## 414 **6 Recommended future work to improve the New Zealand soil database**

415 A key outcome of this research will be to provide direction for future field studies to quantify soil water movement attributes  
416 of New Zealand soils, and to prioritise which measurements will have the greatest value to reduce the uncertainty in modelling  
417 of the soil moisture retention and hydraulic conductivity relationships. Recommendations are:

- 418 • Evaluate the spatial representativeness of the current soil physics data set and undertake more measurements of  
419 hydraulic conductivity and soil water retention on key soils,
- 420 • Use larger cores for measurements of hydraulic conductivity,
- 421 • Take measurements of the moisture retention curve and saturated hydraulic conductivity on the same sample,
- 422 • Provide more accurate measurements of total porosity.

- Conduct near saturation measurements of  $\theta(h)$  and  $K(\theta)$  to better characterize the macropore domain, which is responsible for preferential flow behaviour,
- Make more accurate measurements on slowly permeable soils ( $< 1 \text{ cm day}^{-1}$ ), which are important for management purposes but are not well represented in the current databases.

## 7 Conclusions

We report here on further adaptations to the saturated hydraulic conductivity unimodal to suit it to dual-porosity structured soils by computing the soil water flux through a continuous function of a modified version of Romano et al. (2011)  $\theta(h)$  dual pore-size distribution. The shape of the Romano  $\theta(h)$  distribution is identical to the modified  $\theta(h)$ , but the advantage of the developed bimodal  $\theta(h)$  is that it is more easily parameterized when no data are available in the macropore domain.

The stratification of the data with texture only (loam or clay) slightly improved the predictions of the  $K_s$  model, which is based on pore-size distribution. This gives us confidence that the  $K_s$  model is accounting for the effect of these physical parameters on  $K_s$ . A significant improvement was made by separating topsoils from subsoils. The improvements are higher for the topsoil, which has higher macroporosity caused by roots and tillage compared to subsoils. The reason why a model with no stratification is not sufficient is unclear and requires further investigation.

The improvements made by using the developed bimodal  $K_{s\_bim}$  (Eq. 20) compared to the unimodal  $K_{s\_uni}$  (Eq. 8) is modest overall, but, as expected, greater for topsoils having larger macroporosity. Nevertheless, an acceptable fit between  $K_{s\_bim}$  with  $K_{s\_obs}$  was obtained when due recognition was given to the high variability in the measured data. We expect  $K_{s\_bim}$  to provide greater improvement in  $K_s$  predictions if more  $\theta(h)$  measurements are made at tensions near saturation and if measurements are made on larger cores and with more accurate measurements of porosity.

## Data availability

The data are part of the New Zealand soil databases, available at <http://smap.landcareresearch.co.nz/> and <https://soils.landcareresearch.co.nz/>.

## Acknowledgements

We are grateful to Leah Kearns and for Ray Prebble, who improved the readability of the manuscript and for anonymous reviewers who significantly improved the clarity of the manuscript. We are also thankful for Dr Ian Lynn for his input on soil heterogeneity. This project was funded by Landcare Research core funding, through the New Zealand Ministry of Business, Innovation and Employment.

455 **References**

- 456 Anon: The History of Poiseuille's Law, *Annual Review of Fluid Mechanics*, 25(1), 1–20,  
457 doi:10.1146/annurev.fl.25.010193.000245, 1993.
- 458 Anderson, J. L., and Bouma, J.: Relationships between saturated hydraulic conductivity and morphometric data of an argillic  
459 horizon1, *Soil Sci. Soc. Am. J.*, 37, 408–413, doi:10.2136/sssaj1973.03615995003700030029x, 1973b.
- 460 Arya, L. M., and Paris, J. F.: A physicoempirical model to predict the soil moisture characteristic from particle-size distribution  
461 and bulk density data, *Soil Science Society of America Journal*, 45, 1023–1030,  
462 doi:10.2136/sssaj1981.03615995004500060004x, 1981.
- 463 Balland, V., and Pollacco, J. A. P.: Modeling soil hydraulic properties for a wide range of soil conditions, *Ecological  
464 Modelling*, 219, 300–316, 2008.
- 465 Borgesen, C. D., Jacobsen, O. H., Hansen, S., and Schaap, M. G.: Soil hydraulic properties near saturation, an improved  
466 conductivity model, *Journal of Hydrology*, 324, 40–50, doi:10.1016/j.jhydrol.2005.09.014, 2006.
- 467 Brooks, R. H., and Corey, A. T.: Hydraulic properties of porous media, *Hydrol. Pap.*, 3, 1964.
- 468 Carrick, S.: The dynamic interplay of mechanisms governing infiltration into structured and layered soil columns, PhD, Lincoln  
469 University, Lincoln, 2009.
- 470 Carrick, S., Almond, P., Buchan, G., and Smith, N.: In situ characterization of hydraulic conductivities of individual soil profile  
471 layers during infiltration over long time periods, *European Journal of Soil Science*, 61, 1056–1069, doi:10.1111/j.1365-  
472 2389.2010.01271.x, 2010.
- 473 Carrick, S., Buchan, G., Almond, P., and Smith, N.: Atypical early-time infiltration into a structured soil near field capacity:  
474 the dynamic interplay between sorptivity, hydrophobicity, and air encapsulation, *Geoderma*, 160(3–4), 579–589,  
475 doi:10.1016/j.geoderma.2010.11.006, 2011.
- 476 Chapuis, R. P.: Predicting the saturated hydraulic conductivity of sand and gravel using effective diameter and void ratio, *Can.  
477 Geotech. J.*, 41(5), 787–795, doi:10.1139/t04-022, 2004.
- 478 Childs, E. C., and Collisgeorge, N.: The permeability of porous materials, *Proc. R. Soc. Lon. Ser-A*, 201, 392–405,  
479 doi:10.1098/rspa.1950.0068, 1950.
- 480 Cichota, R., Vogeler, I., Snow, V. O., and Webb, T. H.: Ensemble pedotransfer functions to derive hydraulic properties for  
481 New Zealand soils, *Soil Research*, 51, 94–111, doi:10.1071/sr12338, 2013.
- 482 Dane, J.H., and Topp, G. C.: *Methods of Soil Analysis, Part 4. Physical Methods. Soil Science Society of America Book Series  
483 No. 5. Madison, WI, USA Pages 692–698, 2002*
- 484 Durner, W.: Hydraulic conductivity estimation for soils with heterogeneous pore structure, *Water Resources Research*, 30,  
485 211–223, doi:10.1029/93wr02676, 1994.
- 486 Fatt, I., and Dykstra, H.: Relative permeability studies, *T. Am. I. Min. Met. Eng.*, 192, 249–256, 1951.
- 487 Gradwell, M. W.: Methods for physical analysis of soils. In *New Zealand Soil Bureau Scientific Report No. 10C, 1972.*
- 488 Griffiths, E., Webb, T. H., Watt, J. P. C., and Singleton, P. L.: Development of soil morphological descriptors to improve field  
489 estimation of hydraulic conductivity, *Australian Journal of Soil Research*, 37, 971–982, doi:10.1071/sr98066, 1999.
- 490 Haverkamp, R., Leij, F. J., Fuentes, C., Sciortino, A., and Ross, P. J.: Soil water retention: I. Introduction of a shape index,  
491 *Soil Science Society of America Journal*, 69, 1881–1890, doi:10.2136/sssaj2004.0225, 2005.
- 492 Hayashi, Y., Kosugi, K., and Mizuyama, T.: Soil water retention curves characterization of a natural forested hillslope using  
493 a scaling technique based on a lognormal pore-size distribution, *Soil Science Society of America Journal*, 73, 55–64,  
494 2009.
- 495 Jarvis, N. J., and Messing, I.: Near-saturated hydraulic conductivity in soils of contrasting texture measured by tension  
496 infiltrometers, *Soil Science Society of America Journal*, 59, 27–34, 1995.
- 497 Jarvis, N. J.: A review of non-equilibrium water flow and solute transport in soil macropores: principles, controlling factors  
498 and consequences for water quality, *European Journal of Soil Science*, 58, 523–546, doi:10.1111/j.1365-  
499 2389.2007.00915.x, 2007.
- 500 Koenker, R.: *Quantile Regression*, Cambridge University Press, New York, 2005.
- 501 Kosugi, K.: Lognormal distribution model for unsaturated soil hydraulic properties, *Water Resources Research*, 32, 2697–  
502 2703, doi:10.1029/96wr01776, 1996.
- 503 Landcare Research, S-map - New Zealand's national soil layer: <http://smap.landcareresearch.co.nz>, 2015.
- 504 Leij, F. J., Alves, W. J., van Genuchten, M. T., and Williams, J. R.: The UNSODA unsaturated soil hydraulic database, in:  
505 *Proceedings of the International Workshop on Characterization and Measurement of the Hydraulic Properties of  
506 Unsaturated Porous Media*, 1269–1281, 1999.
- 507 Leij, F. J., Haverkamp, R., Fuentes, C., Zatarain, F., and Ross, P. J.: Soil water retention: II. Derivation and application of  
508 shape index, *Soil Science Society of America Journal*, 69, 1891–1901, doi:10.2136/sssaj2004.0226, 2005.

- 509 Lilburne, L. R., Hewitt, A. E., and Webb, T. W.: Soil and informatics science combine to develop S-map: a new generation  
510 soil information system for New Zealand, *Geoderma*, 170, 232–238, doi:10.1016/j.geoderma.2011.11.012, 2012.
- 511 Lilly, A., Nemes, A., Rawls, W. J., and Pachepsky, Y. A.: Probabilistic approach to the identification of input variables to  
512 estimate hydraulic conductivity, *Soil Science Society of America Journal*, 72, 16–24, doi:10.2136/sssaj2006.0391, 2008.
- 513 Mbonimpa, M., Aubertin, M., Chapuis, R. P. and Bussi re, B.: Practical pedotransfer functions for estimating the saturated  
514 hydraulic conductivity, *Geotechnical and Geological Engineering*, 20(3), 235–259, doi:10.1023/A:1016046214724,  
515 2002.
- 516 McKenzie, N., and Jacquier, D.: Improving the field estimation of saturated hydraulic conductivity in soil survey, *Australian  
517 Journal of Soil Research*, 35, 803–825, doi:10.1071/s96093, 1997.
- 518 McKenzie, N. J., and Cresswell, H. P.: Field sampling. In: *Soil Physical Measurement and Interpretation for Land Evaluation*,  
519 CSIRO, Collingwood, Victoria, 2002
- 520 McLeod, M., Aislabie, J., Ryburn, J., and McGill, A.: Regionalizing potential for microbial bypass flow through New Zealand  
521 soils, *Journal of Environmental Quality*, 37, 1959–1967, doi:10.2134/jeq2007.0572, 2008.
- 522 McNeill, S., Webb, T., and Lilburne, L.: Analysis of soil hydrological properties using S-map data., *Landcare Research report  
523 977*, 2012.
- 524 Messing, I., and Jarvis, N. J.: Temporal variation in the hydraulic conductivity of a tilled clay soil as measured by tension  
525 infiltrometers, *Journal of Soil Science*, 44, 11–24, 1993.
- 526 Patil, N. G., and Rajput, G. S.: Evaluation of water retention functions and computer program "ROSETTA" in predicting soil  
527 water characteristics of seasonally impounded shrink-swell soils, *Journal of Irrigation and Drainage Engineering-ASCE*,  
528 135, 286–294, doi:10.1061/(asce)ir.1943-4774.0000007, 2009.
- 529 Pollacco, J. A. P.: A generally applicable pedotransfer function that estimates field capacity and permanent wilting point from  
530 soil texture and bulk density, *Canadian Journal of Soil Science*, 88, 761–774, 2008.
- 531 Pollacco, J. A. P. and Angulo-Jaramillo, R.: A Linking Test that investigates the feasibility of inverse modelling: Application  
532 to a simple rainfall interception model for Mt. Gambier, southeast South Australia, *Hydrological Processes*, 23(14), 2023–  
533 2032
- 534 Pollacco, J. A. P., Braud, I., Angulo-Jaramillo, R. and Saugier, B.: A Linking Test that establishes if groundwater recharge can  
535 be determined by optimising vegetation parameters against soil moisture, *Annals of Forest Science*, 65(7)
- 536 Pollacco, J. A. P., Ugalde, J. M. S., Angulo-Jaramillo, R., Braud, I. and Saugier, B.: A Linking Test to reduce the number of  
537 hydraulic parameters necessary to simulate groundwater recharge in unsaturated soils, *Adv Water Resour*, 31(2), 355–  
538 369, doi:10.1016/j.advwatres.2007.09.002, 2008b.
- 539 Pollacco, J. A. P., Nasta, P., Ugalde, J. M. S., Angulo-Jaramillo, R., Lassabatere, L., Mohanty, B. P., and Romano, N.:  
540 Reduction of feasible parameter space of the inverted soil hydraulic parameters sets for Kosugi model, *Soil Science*, SS-  
541 S-12-00268, 2013.
- 542 Romano, N. and Nasta, P.: How effective is bimodal soil hydraulic characterization? Functional evaluations for predictions of  
543 soil water balance, *Eur. J. Soil Sci.*, 67(4), 523–535, doi:10.1111/ejss.12354, 2016.
- 544 Romano, N., Nasta, P., Severino, G. and Hopmans, J. W.: Using Bimodal Lognormal Functions to Describe Soil Hydraulic  
545 Properties, *Soil Sci. Soc. Am. J.*, 75(2), 468–480, doi:10.2136/sssaj2010.0084, 2011.
- 546 Rogowski, A. S.: Watershed physics – model of soil moisture characteristic, *Water Resources Research*, 7, 1575–1582, 1971  
547 doi:10.1029/WR007i006p01575, 1971.
- 548 Rubio, C. M.: Applicability of site-specific pedotransfer functions and ROSETTA model for the estimation of dynamic soil  
549 hydraulic properties under different vegetation covers, *Journal of Soils and Sediments*, 8, 137–145,  
550 doi:10.1065/jss2008.03.281, 2008.
- 551 Schaap, M. G., and van Genuchten, M. T.: A modified Mualem-van Genuchten formulation for improved description of the  
552 hydraulic conductivity near saturation, *Vadose Zone Journal*, 5, 27–34, 2006.
- 553 ter Braak, C. J. F., and Vrugt, J. A.: Differential evolution Markov chain with snooker updater and fewer chains, *Statistics and  
554 Computing*, 4, 435–446, 2008.
- 555 van Genuchten, M. T.: Closed-form equation for predicting the hydraulic conductivity of unsaturated soils, *Soil Science  
556 Society of America Journal*, 44, 892–898, 1980.
- 557 van Genuchten, M. T., Leij, F. J., and Yates, S. R.: The RETC code for quantifying the hydraulic functions of unsaturated  
558 soils, *The RETC Code for Quantifying the Hydraulic Functions of Unsaturated Soils*, U.S. Department of Agriculture,  
559 Agricultural Research Service 1991.
- 560 Vervoort, R. W., and Cattle, S. R.: Linking hydraulic conductivity and tortuosity parameters to pore space geometry and pore-  
561 size distribution, *Journal of Hydrology*, 272, 36–49, 2003.
- 562 Watt, J. P. C., and Griffiths, E.: Correlation of hydraulic conductivity measurements with other physical properties New  
563 Zealand, *New-Zealand Soil Bureau Commentaries*, 1983, 198–201, 1988.



- 564 Webb, T. H., Claydon, J. J., and Harris, S. R.: Quantifying variability of soil physical properties within soil series to address  
565 modern land-use issues on the Canterbury plains, New Zealand, *Australian Journal of Soil Research*, 38, 1115–1129,  
566 doi:10.1071/sr99091, 2000.
- 567 Webb, T. H., Claydon, J. J. and Harris, S. R.: Quantifying variability of soil physical properties within soil series to address  
568 modern land-use issues on the Canterbury Plains, *New Zealand Soil Res.*, 38(6), 1115–1129, doi:10.1071/SR99091, ,  
569 2000.
- 570 Webb, T. H.: Identification of functional horizons to predict physical properties for soils from alluvium in Canterbury, New  
571 Zealand, *Australian Journal of Soil Research*, 41, 1005–1019, doi:10.1071/sr01077, 2003.
- 572 Wösten, J. H. M., Lilly, A., Nemes, A., and Le Bas, C.: Final report on the EU funded project using existing soil data to derive  
573 hydraulic parameters for simulation models in environmental studies and in land use planning, DLO Winand Staring  
574 Centre, Wageningen, The Netherlands, 1998.
- 575 Wösten, J. H. M., Lilly, A., Nemes, A., and Le Bas, C.: Development and use of a database of hydraulic properties of European  
576 soils, *Geoderma*, 90, 169–185, 1999.
- 577 Young, C. D.: Overview of ROSETTA for estimation of soil hydraulic parameters using support vector machines, *Korean  
578 Journal of Soil Science & Fertilizer*, 42, 18–23, 2009.
- 579  
580

581 **Tables**

582

583 **Table 1. Feasible range of the Kosugi parameters and  $\theta_5$  which is  $\theta$  measured at 5 kPa.**

584

|            | $\theta_s$<br>(cm <sup>3</sup> cm <sup>-3</sup> ) | $\theta_r$<br>(cm <sup>3</sup> cm <sup>-3</sup> ) | $\log_{10} h_m$<br>(cm) | $\sigma$<br>(-) |
|------------|---------------------------------------------------|---------------------------------------------------|-------------------------|-----------------|
| <b>Min</b> | $\theta_5$                                        | 0.0                                               | 1.23                    | 0.8             |
| <b>Max</b> | 0.60                                              | 0.20                                              | 5.42                    | 4.0             |

585

586

587

588 **Table 2. Description of the tortuosity parameters.**

589

---

| <b>Tortuosity</b> | <b>Description</b>                                                                                                                                                                                                                                                                                                                                                                                                                                                            |
|-------------------|-------------------------------------------------------------------------------------------------------------------------------------------------------------------------------------------------------------------------------------------------------------------------------------------------------------------------------------------------------------------------------------------------------------------------------------------------------------------------------|
| $\tau_1$          | Takes into account the increased path length due to crookedness of the path. When $\tau_1 = 0$ the flow path is perfectly straight down. When $\tau_1$ increases, the flow path is no longer straight but meanders.                                                                                                                                                                                                                                                           |
| $\tau_2$          | Theoretically represents the shape of a microscopic capillary tube. The $\tau_2$ parameter is used to estimate restrictions in flow rate due to variations in pore diameter and pore shape. When $\tau_2 = 0$ the shape of the capillary tube is perfectly cylindrical. When $\tau_2$ increases, the tube becomes less perfectly cylindrical, which causes lower connectivity.                                                                                                |
| $\tau_3$          | High porosity soils tend to have large <i>effective pores</i> , $\theta_s - \theta_r$ , which tend to be more connected than soils with smaller effective pores, which have more dead-ends. When $\tau_3 = 0$ the connectivity is the same between high and low porosity soils. When $\tau_3$ increases the connectivity of the soil increases (Vervoort and Cattle, 2003; Pollacco et al., 2013). Pollacco et al. (2013) found $\tau_3$ to be the least sensitive parameter. |

---

590

591

592

593 **Table 3. Theoretical constraints of the  $K_{s\_bim}$  model.**

594

| <b>Constraint</b>                            | <b>Explanation</b>                                                                                                                                                                |
|----------------------------------------------|-----------------------------------------------------------------------------------------------------------------------------------------------------------------------------------|
| $\theta_s \geq \theta_{s\_mac} \gg \theta_r$ | Self-explanatory.                                                                                                                                                                 |
| $0 < \sigma_{mac} \leq 1.5$                  | To avoid any unnecessary overlap of $\theta_{bim}$ with $\theta_{bim\_mat}$ .                                                                                                     |
| $1 > \tau_1 > \tau_{1\_mac} \geq 0$          | Flow in the macropore domain (larger pores) is expected to be straighter than in the matrix domain (smaller pores) due to reduced crookedness of the path.                        |
| $1 > \tau_2 > \tau_{2\_mac} \geq 0$          | It is expected that the shape of the ‘microscopic capillary tube’ of the macropore domain (larger pores) is more perfectly cylindrical than in the matrix domain (smaller pores). |
| $1 > \tau_3 > \tau_{3\_mac} \geq 0$          | The macropore domain has larger pores, and therefore it is assumed that the pores are better connected than the matrix pores.                                                     |

595

596

| Region                    | Soil series   | No. of horizons |          | New Zealand classification     | Soil taxonomy |
|---------------------------|---------------|-----------------|----------|--------------------------------|---------------|
|                           |               | Topsoils        | Subsoils |                                |               |
| Canterbury regional study | Eyre          | 6               | 8        | Weathered Orthic Recent        | Haplustepts   |
|                           | Templeton     | 9               | 17       | Typic Immature Pallic          | Haplustepts   |
|                           | Wakanui       | 9               | 17       | Mottled Immature Pallic        | Humustepts    |
|                           | Temuka        | 9               | 16       | Typic Orthic Gley              | Endoaquepts   |
|                           | Lismore       | 7               | 5        | Pallic Firm Brown              | Dystrustepts  |
|                           | Hatfield      | 9               | 18       | Typic Immature Pallic          | Humustepts    |
|                           | Pahau         | 9               | 18       | Mottled Argillic Pallic        | Haplustalf    |
|                           | Waterton      | 9               | 15       | Argillic Orthic Gley           | Endoaqualfs   |
| Canterbury                | Waimakariri   |                 | 2        | Weathered Fluvial Recent       | Haplustepts   |
|                           | Lismore       |                 | 1        | Pallic Orthic Brown            | Dystrustepts  |
|                           | Templeton     |                 | 6        | Typic Immature Pallic          | Haplustepts   |
|                           | Wakanui       |                 | 2        | Mottled Immature Pallic        | Humustepts    |
|                           | Temuka        |                 | 2        | Typic Orthic Gley              | Endoaquepts   |
| Manawatu                  | Hautere       |                 | 3        | Acidic Orthic Brown            | Dystrudepts   |
|                           | Levin         |                 | 4        | Pedal Allophanic Brown         | Humudepts     |
|                           | Levin mottled |                 | 4        | Mottled Allophanic Brown       | Humudepts     |
|                           | Manawatu      |                 | 1        | Weathered Orthic Recent        | Haplustepts   |
|                           | Paraha        |                 | 3        | Mottled Immature Pallic        | Haplustepts   |
|                           | Westmere      |                 | 2        | Typic Mafic Melanic            | Humudepts     |
| Marlborough               | Brancott      |                 | 3        | Mottled Fragic Pallic          | Haplustepts   |
|                           | Broadridge    |                 | 3        | Mottled-argillic Fragic Pallic | Haplustalf    |
|                           | Grovetown     |                 | 3        | Typic Orthic Gley              | Endoaquepts   |
|                           | Raupara       |                 | 1        | Typic Fluvial Recent           | Ustifluent    |
|                           | Wairau        |                 | 1        | Typic Fluvial Recent           | Ustifluent    |
|                           | Woodburn      |                 | 2        | Pedal Immature Pallic          | Ustochrept    |
| Otago                     | Dukes         |                 | 1        | Typic Orthic Gley              | Endoaquepts   |
|                           | Linnburn      |                 | 2        | Alkaline Immature Semiarid     | Haplocambids  |
|                           | Matau         |                 | 4        | Typic Orthic Gley              | Endoaquepts   |
|                           | Otokia        |                 | 1        | Mottled Fragic Pallic          | Haplustepts   |
|                           | Pinelheugh    |                 | 2        | Pallic Firm Brown              | Eutrudepts    |
|                           | Ranfurly      |                 | 2        | Mottled Argillic Semiarid      | Haploargids   |
|                           | Tawhiti       |                 | 2        | Pallic Firm Brown              | Eutrudepts    |
|                           | Tima          |                 | 2        | Typic Laminar Pallic           | Haplustepts   |
|                           | Waenga        |                 | 2        | Typic Argillic Semiarid        | Haploargids   |
|                           | Wingatui      |                 | 2        | Weathered Fluvial Recent       | Haplustepts   |
| Southland                 | Waikiwi       |                 | 2        | Typic Firm Brown               | Humudepts     |
|                           | Waikoikoi     |                 | 2        | Perch-gley Fragic Pallic       | Fragiaqualfs  |

599

600 **Table 5. The  $RMSE_{\log10}$  reported by using  $K_{s\_bim}$  and  $K_{s\_uni}$  models, by stratifying the data with/without texture and layers**

601

| <b>Data stratification with</b>       | <b><math>RMSE_{\log10}</math></b> |              |                           |
|---------------------------------------|-----------------------------------|--------------|---------------------------|
|                                       | $K_{s\_uni}$                      | $K_{s\_bim}$ | $K_{s\_bim} - K_{s\_uni}$ |
| <b>All data combined</b>              | 0.583                             | 0.560        | 0.023                     |
| <b>Loam &amp; clay (texture)</b>      | 0.577                             | 0.543        | 0.034                     |
| <b>Topsoil &amp; subsoil (layers)</b> | 0.450                             | 0.430        | 0.020                     |

603

604

605

606

607

608

609 **Table 6. Optimal tortuosity parameters of  $K_{s\_uni}$  and  $K_{s\_bim}$ .**

610

|                                |                | <b>N</b> | <b>RMSE<sub>log10</sub></b> | <b>T<sub>1</sub></b> | <b><math>\tau_2</math></b> | <b><math>\tau_3</math></b> | <b>T<sub>1_mac</sub></b> | <b><math>\tau_{2\_mac}</math></b> | <b><math>\tau_{3\_mac}</math></b> | <b><math>\sigma_{mac}</math></b> |
|--------------------------------|----------------|----------|-----------------------------|----------------------|----------------------------|----------------------------|--------------------------|-----------------------------------|-----------------------------------|----------------------------------|
| <b><math>K_{s\_bim}</math></b> | <b>Topsoil</b> | 51       | 0.232                       | 5.007                | 0.969                      | 0.787                      | 4.734                    | 0.511                             | 0.041                             | 0.322                            |
|                                | <b>Subsoil</b> | 181      | 0.471                       | 6.444                | 0.859                      | 0.408                      | 3.973                    | 0.642                             | 0.729                             | 1.272                            |
| <b><math>K_{s\_uni}</math></b> | <b>Topsoil</b> | 51       | 0.259                       | 5.859                | 0.967                      | 0.530                      | -                        | -                                 | -                                 | -                                |
|                                | <b>Subsoil</b> | 181      | 0.491                       | 6.484                | 0.854                      | 0.316                      | -                        | -                                 | -                                 | -                                |

611

612

613

614

615 **Table 7. Descriptive statistics of the optimized  $\theta_{\text{mac}}$  ( $\theta_s - \theta_{s,\text{mac}}$ ),  $\theta_s$ ,  $h_m$  and  $\sigma$  Kosugi hydraulic parameters. The bar represents the**  
 616 **average value, SD the standard deviation and  $N$  the number of measurement points.**

617

|                |     | $\overline{\theta_{\text{mac}}}$    | SD                                  | SD                                  |                                     |                                     |       | $\overline{\ln h_m}$ | SD $\ln h_m$ | $\bar{\sigma}$ | SD $\sigma$ | $\overline{K_s}$      | SD $K_s$              |
|----------------|-----|-------------------------------------|-------------------------------------|-------------------------------------|-------------------------------------|-------------------------------------|-------|----------------------|--------------|----------------|-------------|-----------------------|-----------------------|
|                | N   | $\theta_{\text{mac}}$               | $\theta_s$                          | $\theta_s$                          | $\theta_{s,\text{mac}}$             | $\theta_{s,\text{mac}}$             | $h_m$ | $h_m$                | $\ln h_m$    | $\sigma$       | $\sigma$    | $K_s$                 | $K_s$                 |
|                |     | (cm <sup>3</sup> cm <sup>-3</sup> ) | (cm <sup>3</sup> cm <sup>-3</sup> ) | (cm <sup>3</sup> cm <sup>-3</sup> ) | (cm <sup>3</sup> cm <sup>-3</sup> ) | (cm <sup>3</sup> cm <sup>-3</sup> ) | (cm)  | (cm)                 | (-)          | (-)            | (-)         | (cm h <sup>-1</sup> ) | (cm h <sup>-1</sup> ) |
| <b>Topsoil</b> | 51  | 0.038                               | 0.035                               | 0.48                                | 0.04                                | 0.45                                | 0.04  | 6.43                 | 1.02         | 3.00           | 0.61        | 167.                  | 101.                  |
| <b>Subsoil</b> | 181 | 0.030                               | 0.030                               | 0.42                                | 0.05                                | 0.39                                | 0.06  | 5.39                 | 1.66         | 2.64           | 0.86        | 19.                   | 42.                   |

618



619

620 **Table 8. Summary of the quantile regression fit of the log-transformed residuals.**

621

| Quantile       | $\alpha_0$ |                    | $\alpha_1$ |                    |
|----------------|------------|--------------------|------------|--------------------|
|                | Estimate   | 95% CI             | Estimate   | 95% CI             |
| $\tau = 0.025$ | -0.476     | $[-\infty, -0.44]$ | -0.574     | $[-0.62, \infty]$  |
| $\tau = 0.500$ | 0.041      | $[-0.036, 0.080]$  | 0.041      | $[-0.093, 0.053]$  |
| $\tau = 0.975$ | 0.357      | $[0.332, \infty]$  | 0.627      | $[-\infty, 0.711]$ |

622

623

624

625

Figures

626

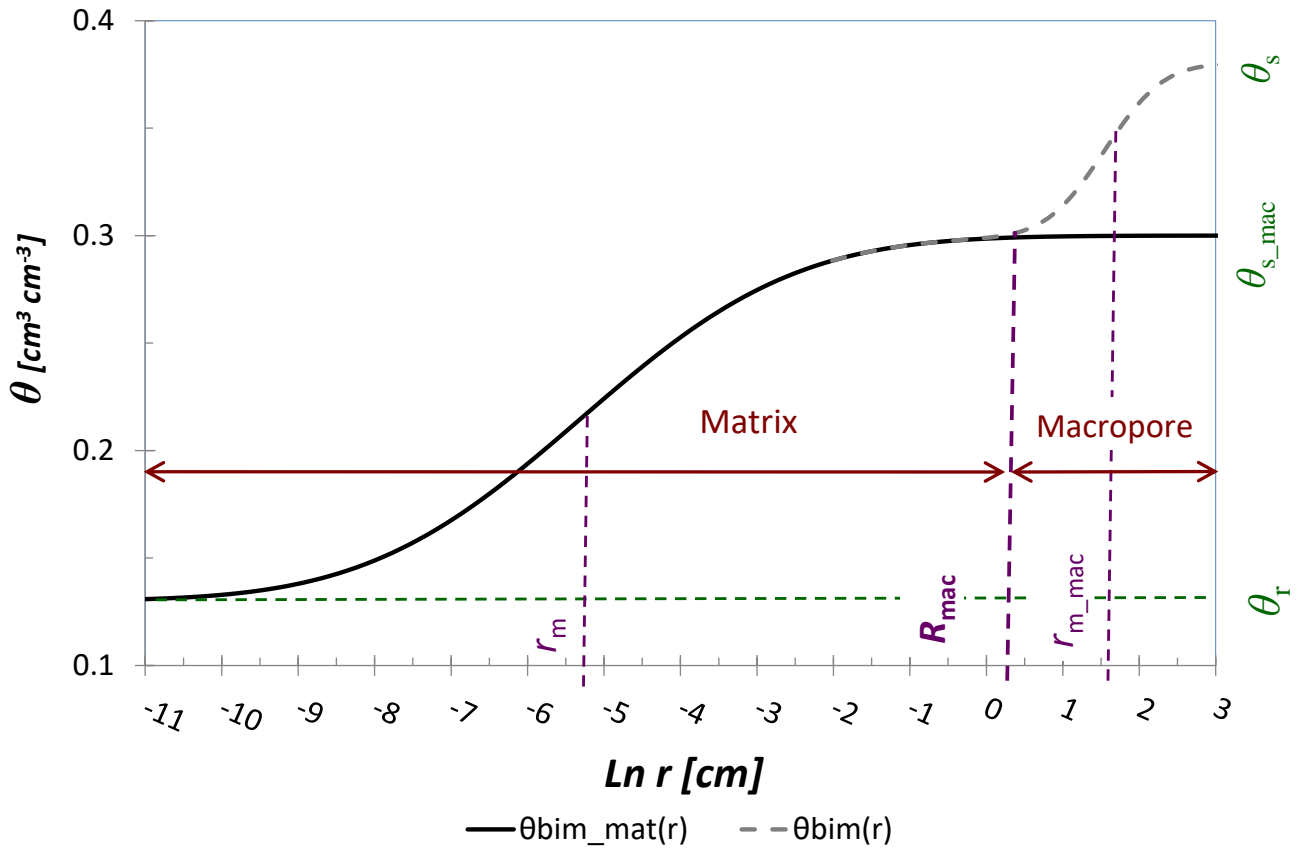

627

628

629

Figure 1. A typical Kosugi  $\theta_{\text{bim}}(r)$  (Eq. (10a)) and  $\theta_{\text{bim\_mat}}(r)$  (Eq. (10b)) with the matrix and macropore domains and the positions of  $\theta_s$ ,  $\theta_{s\_mac}$ ,  $\theta_r$ ,  $r_m$ ,  $r_{m\_mac}$ ,  $R_{mac}$  shown.

630

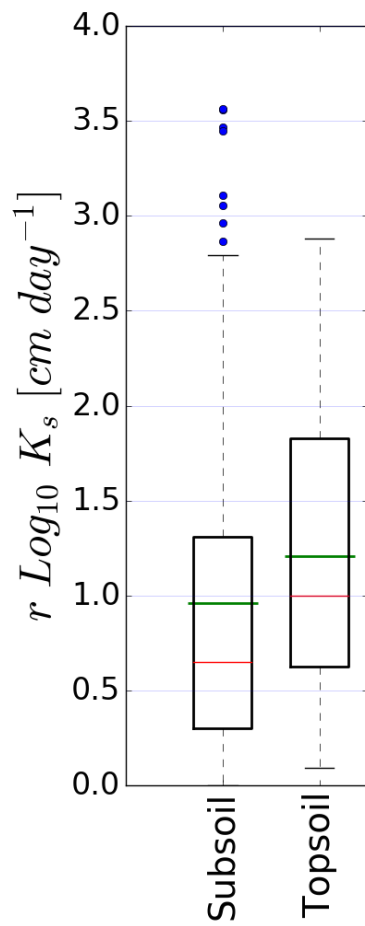

631

632 **Figure 2. Uncertainty of the standard error of the observed  $K_s$  in topsoil and subsoil. The lines in the box show upper and lower**  
 633 **quartiles, the median (red), and mean (green). Whiskers show values within 1.5 times the quartile spread; values outside this range**  
 634 **are shown as plotted points.**

635

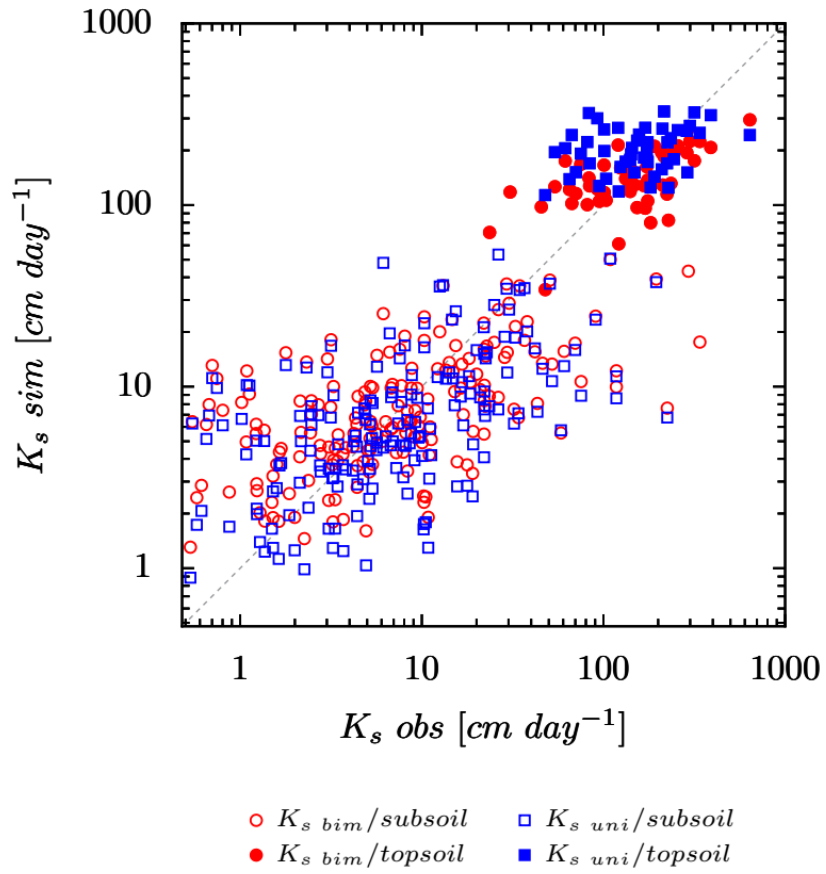

636

637 **Figure 3.** Plot between  $K_{s\_obs}$  against  $K_{s\_bim}$  and  $K_{s\_uni}$  for topsoil and subsoil. The dotted line refers to the 1:1 line.

638

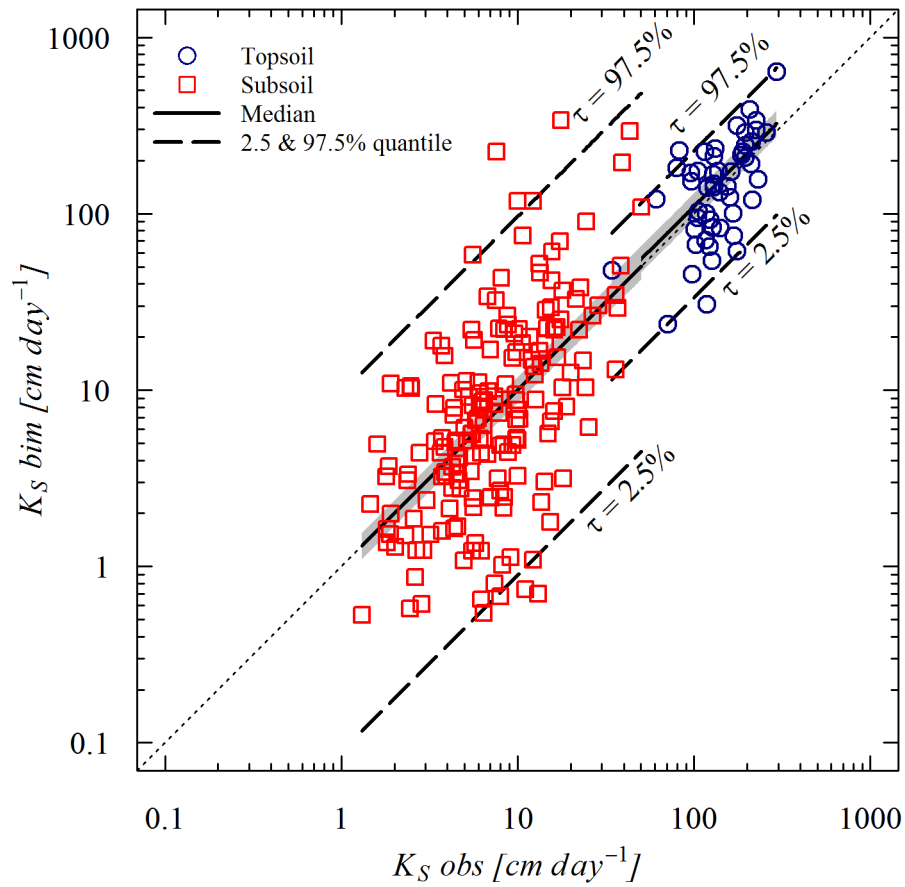

639

640

641

642

**Figure 4. Error of  $K_{s, bim}$  plotted against  $K_{s, obs}$  for topsoil and subsoil. The solid line refers to the median line for each group, the dashed line refers to the upper or lower 95% confidence interval lines, the dotted line refers to the 1:1 correspondence line, and the shaded region is the 95% confidence interval of the median estimate**

643

644
